# Supplementary material for: Suppression of Rice Osa-miR444.2 Improves the Resistance to Sheath Blight in Rice Mediating through the Phytohormone Pathway
Source: MDPI journal article supplement (doi:10.3390/ijms24043653), 2023-02-11
Supplement: s1 [file s1]

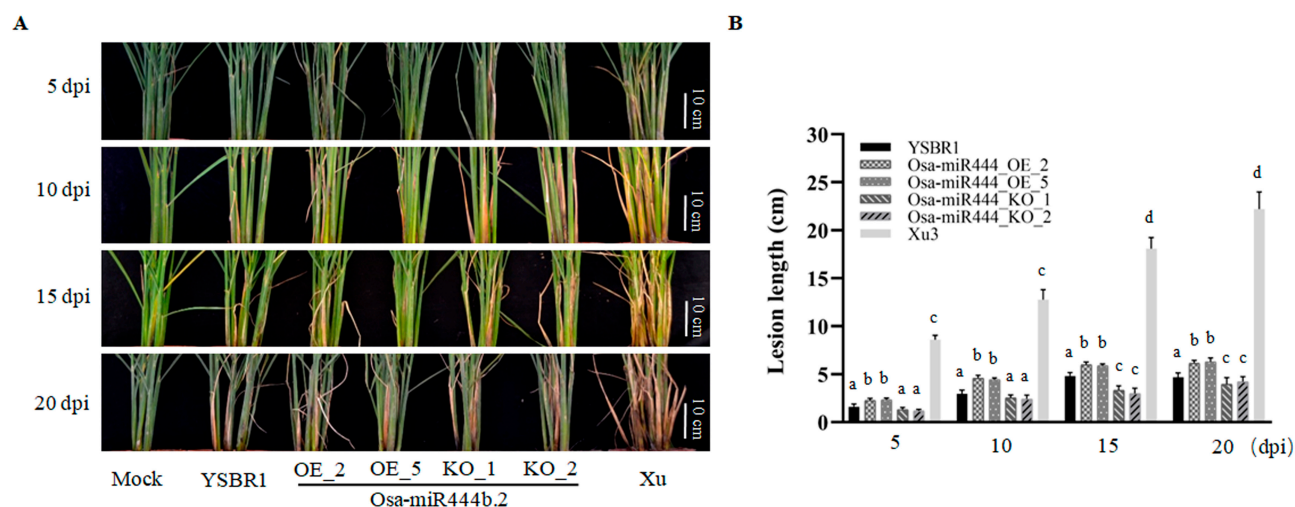

**Figure S1** Osa-miR444b.2 enhanced rice susceptibility to sheath blight in YSBR1.

**A** Disease phenotypes at different time points after infected by *R. solani*. Scale bar, 10 cm. **B** The lesion length of knockout materials at different time points after infected by *R. solani*. The lesion length of overexpression materials at different time points after infected by *R. solani*. a presents the largest average, bcd present significance ( $P < 0.01$ ).

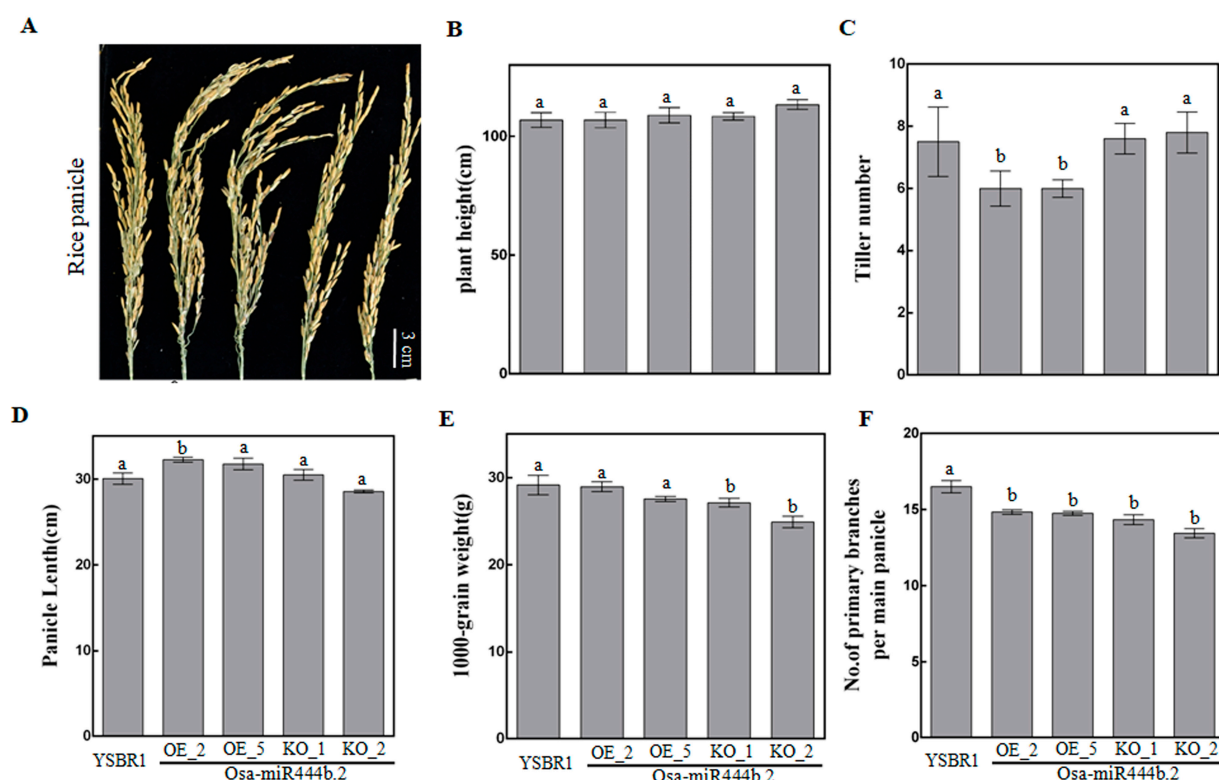

**Figure S2** Osa-miR444b.2 expression level affects the agronomic traits in YSBR1.

**A** Panicle morphology of Osa-miR444b.2 knockout and overexpression materials. **B** Statistics of the plant height. **C** Statistics of the tiller number. **D** Statistics of the panicle length. **E** Statistics of the 1000-grains weight. **F** Statistics of the number of primary branches per main panicle. a presents the largest average, b present significance ( $P < 0.01$ ).

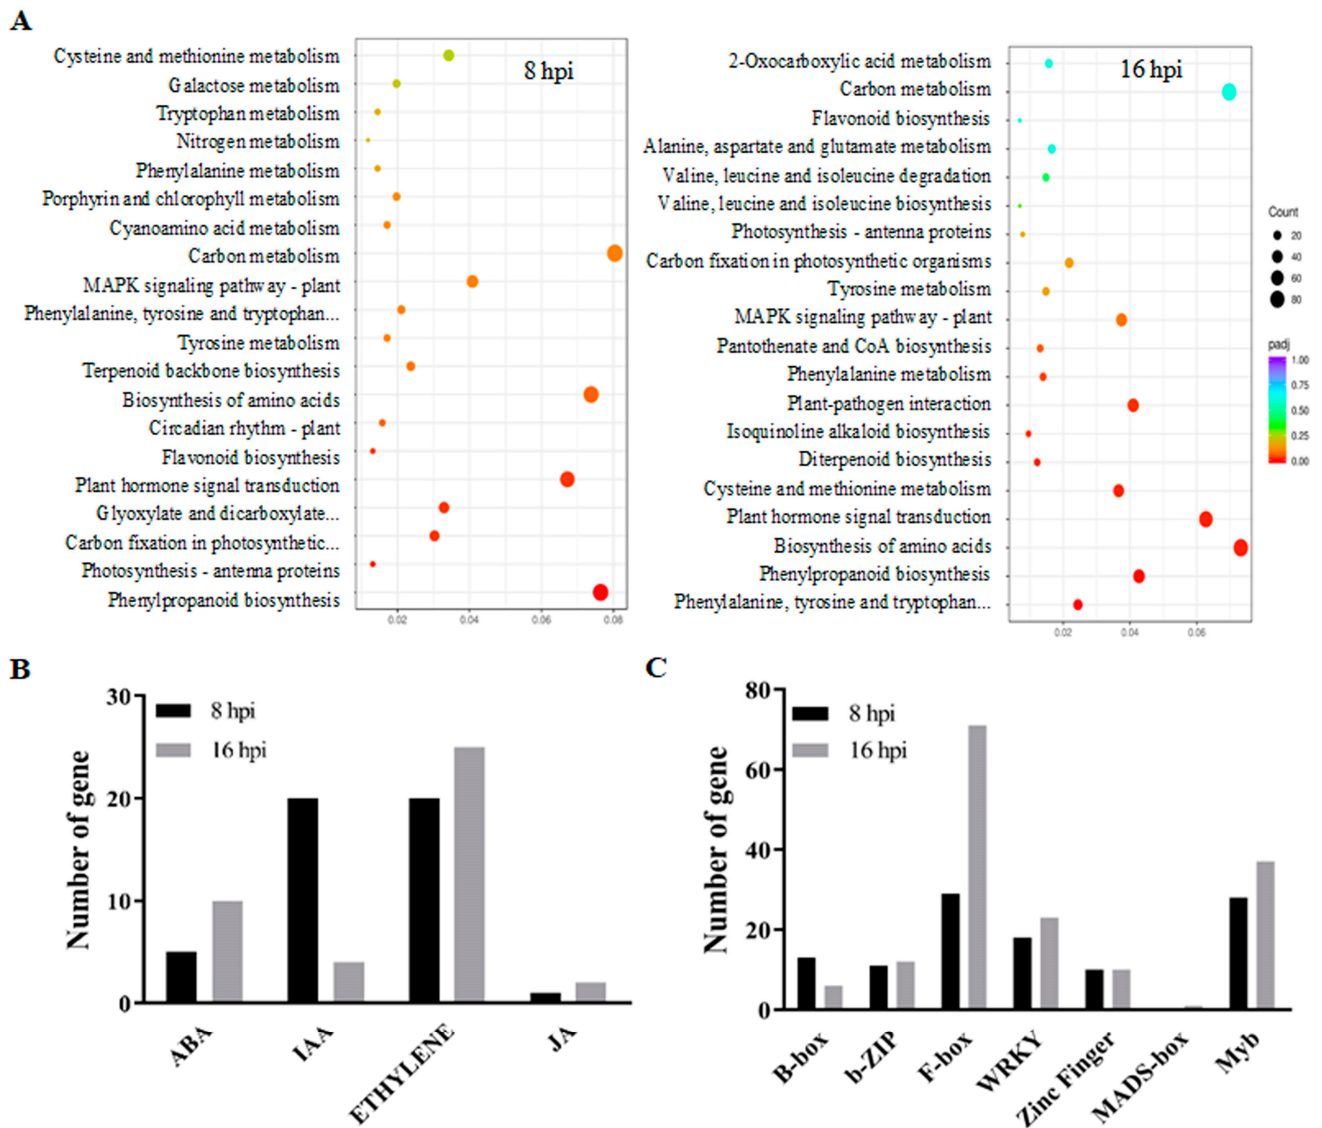

**Figure S3** Osa-miR444b.2 participates in the response to *R. solani* infection by regulating plant hormone signal transduction pathway and transcription factors.

**A** Top 20 enriched KEGG pathways of differentially expressed genes in differential time.

**B** The number of differentially expressed genes in plant hormone signal transduction.

**C** The number of differentially expressed genes of TFs.

**Table S1** Table Primers used in this study.

| Purpose       | ID                | Sequence (5'→3')            |
|---------------|-------------------|-----------------------------|
| Reverse       | miR444- stemloop  | GTCGTATCCAGTGCAGGGTCCGAGGTA |
| Transcription | primer            | TTCGCACTGGATACGACAAGCTT     |
| qRT-PCR       | miR444-RT-F       | GCGGCGGTGCAGTTGTTGTCTC      |
|               | Universal reverse | GTGCAGGGTCCGAGGT            |
|               | primer            |                             |
|               | Os18s RNA-F       | CTACGTCCCTGCCCTTTGTACA      |

---

|                        |                       |
|------------------------|-----------------------|
| <i>Os18s</i> RNA-R     | ACACTTCACCGGACCATTCAA |
| <i>Os12g26290</i> RT-F | GACCTCCGTGATGTTTTCTC  |
| <i>Os12g26290</i> RT-R | CAGCATTATGGGGGTCGTTG  |
| <i>Os07g03730</i> RT-F | CGGAGAAGCAGTGGTACGAC  |
| <i>Os07g03730</i> RT-R | GCGAGTAGTTGCAGGTGATG  |
| <i>Os08g38990</i> RT-F | GTGCCAACCAGAAATCAAGC  |
| <i>Os08g38990</i> RT-R | CAGTGGTAGGAGAAGGTTGT  |
| <i>Os12g36850</i> RT-F | GCTGTGGAAGGTCTGCTTGG  |
| <i>Os12g36850</i> RT-R | CCAACACCTCAACCTTTAGC  |
| <i>Os11g37950</i> RT-F | CTACGTGGGACGCTAACAAG  |
| <i>Os11g37950</i> RT-R | CTTGGTGAAGACGGTGTCCC  |
| <i>Os09g25070</i> RT-F | CGTGACAACCCCTACCCTAG  |
| <i>Os09g25070</i> RT-R | CCGACGAGTTGATGGAGATG  |
| <i>Os02g33820</i> RT-F | GCGTGGTGGACTACGACAAG  |
| <i>Os02g33820</i> RT-R | CGTGCTTCTTGGCGTCCTTC  |
| <i>Os01g72910</i> RT-F | GCAAGGAGGAGAAGCACCAC  |
| <i>Os01g72910</i> RT-R | GTGCTTCTTGGCTTCCTTCT  |
| <i>Os01g32380</i> RT-F | GACGTGGACAGGTTCTACGC  |
| <i>Os01g32380</i> RT-R | GCTGTCCACCTTCTTCTCCG  |
| <i>Os03g18850</i> RT-F | TCAACTTCACCTCAGCCATG  |
| <i>Os03g18850</i> RT-R | GTGATCTCGTCCTTCACCTC  |

---
